# Supplementary material for: Endothelial VEGFR Coreceptors Neuropilin-1 and Neuropilin-2 Are Essential for Tumor Angiogenesis
Source: PubMed Central journal article supplement (PMC10036134; doi:10.1158/2767-9764.crc-22-0250), 2022-12-14
Supplement: crc-22-0250-s01.pdf [file crc-22-0250-s01.pdf]

# Suppl. Figure 1

## A

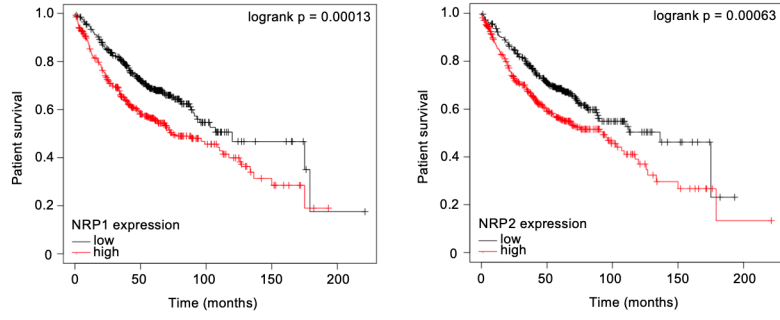

## B

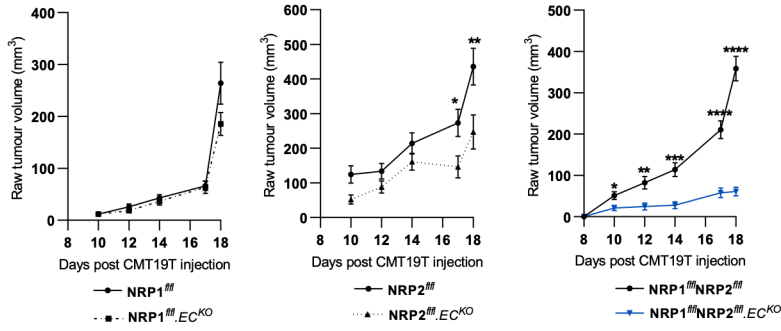

## C

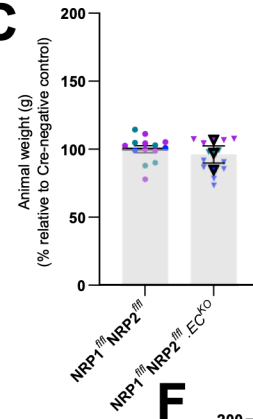

## D

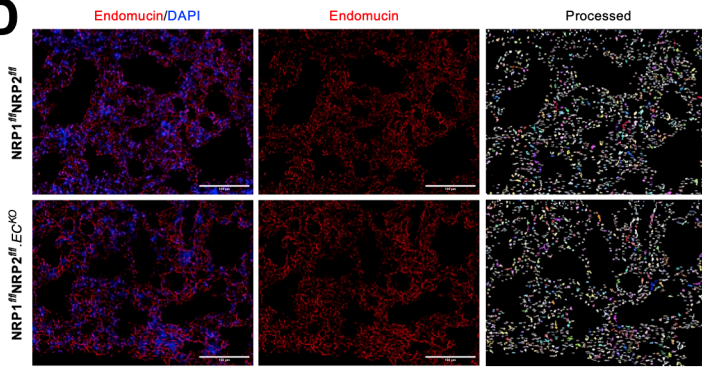

## E

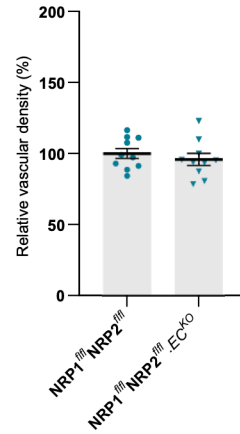

## F

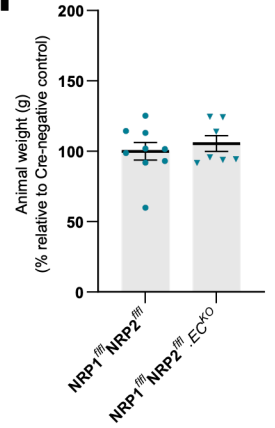

## G

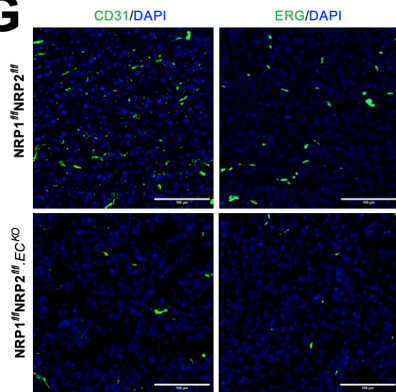

## H

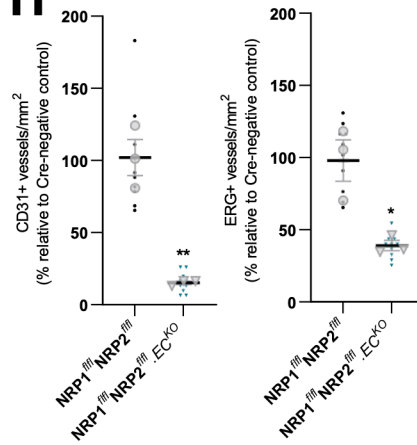

# Suppl. Figure 1 continued

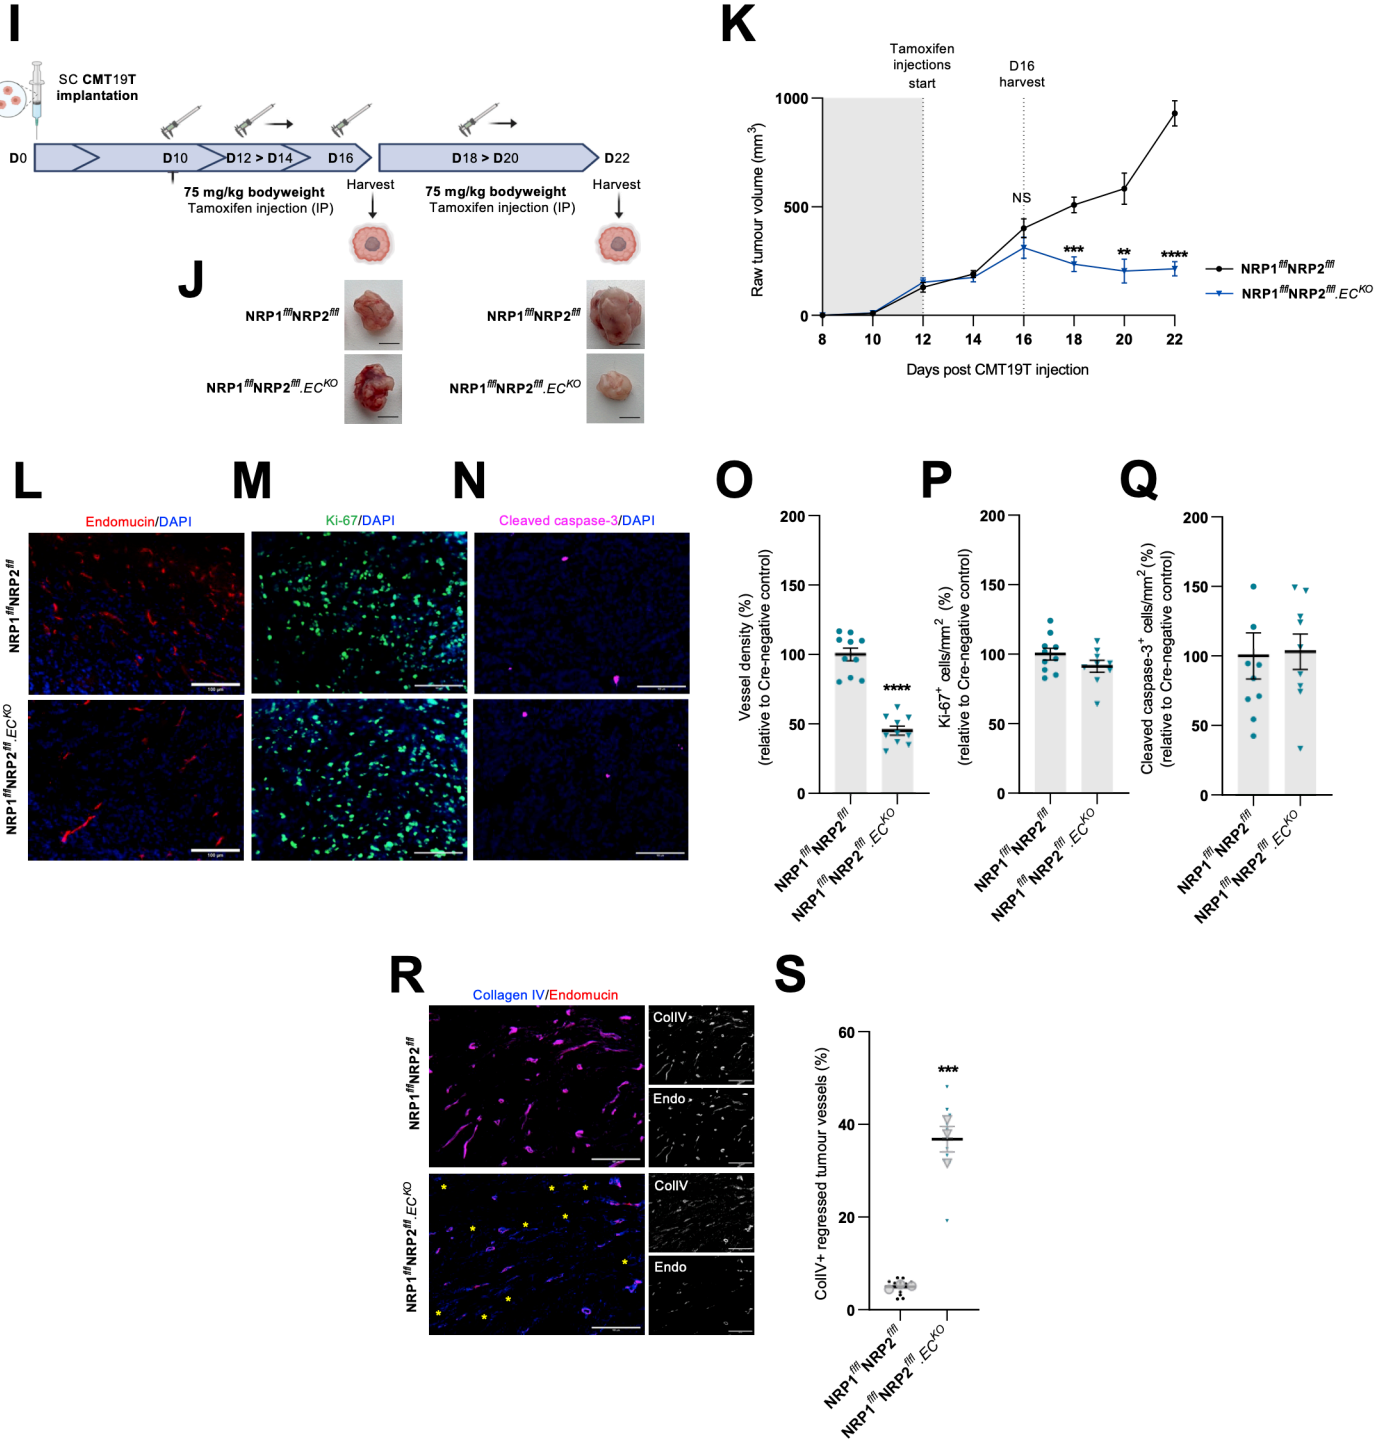

**Supplementary Figure 1: A)** Determination of prognostic value of NRP1 and NRP2 receptor mRNA expression in lung carcinoma patients (n = 719) using [www.kmplot.com](http://www.kmplot.com). (*Left panel*) Kaplan-Meier survival plot of lung carcinoma patients with high NRP1 mRNA expression (*Affymetrix ID: 210615\_at*). (*Right panel*) Kaplan-Meier survival plot of lung carcinoma patients with high NRP2 mRNA expression (*Affymetrix ID: 214632\_at*). Respective logrank *p* values are shown. **B)** Raw tumour volume growth kinetics from 10 days post CMT19T injections to harvest. Error bars show mean  $\pm$  SEM; N=3 (n $\geq$ 12). **C)** Quantification of mean animal weight measured at point of harvest. Data presented as a percentage of the average animal weight observed in respective littermate controls. Error bars show mean  $\pm$  SEM, N=3 (n $\geq$ 12). **D)** Representative lung sections from Cre-negative and Cre-positive animals following tamoxifen treatment showing endomucin<sup>+</sup> vasculature. Scale bar = 100  $\mu$ m. **E)** Quantification of % blood vessel density per mm<sup>2</sup> from lung sections. Data presented as a percentage of the average % vessel density observed in their Cre-negative littermate controls. Error bars show mean  $\pm$  SEM; n $\geq$ 10. **F)** Quantification of mean animal weight measured at point of harvest. Data presented as a percentage of the average animal weight observed in respective littermate controls. Error bars show mean  $\pm$  SEM, n $\geq$ 6. **G)** Representative tumour sections from Cre-negative and Cre-positive CMT19T tumours showing CD31 (*left panels*) and ERG<sup>+</sup> vasculature (*right panels*). Scale bar = 100  $\mu$ m. **H)** Corresponding quantification of % blood vessel density per mm<sup>2</sup>. Mean quantification performed on 3x ROIs per tumour section, from 1-3 sections per tumour. Data presented as a percentage of the average % vessel density observed in their Cre-negative littermate controls. Error bars show mean  $\pm$  SEM; n $\geq$ 3. **I)** Delayed experimental schematic: tamoxifen-induced activation of Cre-recombinase and thus deletion of targets was employed via the following regime. Cre-positive and Cre-negative littermate control mice received intraperitoneal (IP) injections of tamoxifen (75 mg/kg bodyweight, 2mg/ml stock) from D12 to induce Cre-recombinase activity. CMT19T lung carcinoma cells (1x10<sup>6</sup>) were implanted subcutaneously (SC) into the flank of mice at D0 and allowed to grow until D16/D24. **J)** Representative images of CMT19T tumours harvested on D16/D22 removed from Cre-negative and positive mice. Scale bar shows 5 mm. **K)** Raw tumour volume growth kinetics from 10 days post CMT19T injections to harvest. Error bars show mean  $\pm$  SEM; n $\geq$ 6. **L-N)** Representative tumour sections from Cre-negative and Cre-positive D16 tumours showing endomucin<sup>+</sup> blood vessels (**L**), Ki-67<sup>+</sup> proliferating cells (**M**), and cleaved caspase-3<sup>+</sup> apoptotic cells (**N**). Scale bar = 100  $\mu$ m. **O-Q)** Quantification of % blood vessel density (**O**), % Ki-67<sup>+</sup> proliferating cells (**P**), and % cleaved caspase-3<sup>+</sup> apoptotic cells (**Q**) per mm<sup>2</sup> from CMT19T tumours. Mean quantification performed on 3x ROIs per tumour section, from 1-3 sections per tumour. Data presented as a percentage of the average % observed in their Cre-negative littermate controls. Error bars show mean  $\pm$  SEM; n $\geq$ 9. **R)** Representative tumour sections from Cre-negative and Cre-positive D16 tumours showing ColIV<sup>+</sup> basement membrane sleeves colocalising with endomucin<sup>+</sup> blood vessels. Yellow asterix label regressed ColIV<sup>+</sup> endomucin<sup>-</sup> vessels. Scale bar = 100  $\mu$ m. **S)** Quantification of % vessel regression, performed on  $\geq$ 4 ROIs/tumour. Error bars show mean  $\pm$  SEM; n $\geq$ 3. Asterix indicate significance.
