# Supplementary material for: Endothelial VEGFR Coreceptors Neuropilin-1 and Neuropilin-2 Are Essential for Tumor Angiogenesis
Source: PubMed Central journal article supplement (PMC10036134; doi:10.1158/2767-9764.crc-22-0250), 2022-12-14
Supplement: crc-22-0250-s02.pdf [file crc-22-0250-s02.pdf]

# Suppl. Figure 2

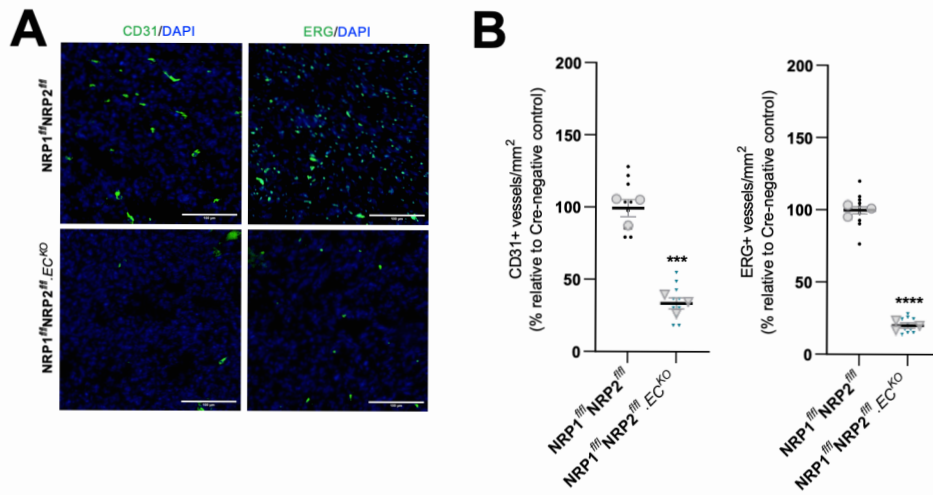

**Supplementary Figure 2: A)** Representative tumour sections from Cre-negative and Crepositive PyMT-BO1 tumours showing CD31 (left panels) and ERG+ vasculature (right panels). Scale bar = 100  $\mu$ m. **B)** Corresponding quantification of % blood vessel density per mm<sup>2</sup> from PyMT-BO1 tumours. Mean quantification performed on 3x ROIs per tumour section, from 1-3 sections per tumour. Data presented as a percentage of the average % vessel density observed in their Cre-negative littermate controls. Error bars show mean  $\pm$  SEM; n $\geq$ 3. Asterix indicate significance.
