# Supplementary material for: Endothelial VEGFR Coreceptors Neuropilin-1 and Neuropilin-2 Are Essential for Tumor Angiogenesis
Source: PubMed Central journal article supplement (PMC10036134; doi:10.1158/2767-9764.crc-22-0250), 2022-12-14
Supplement: crc-22-0250-s03.pdf [file crc-22-0250-s03.pdf]

# Supplementary Figure 3

## A

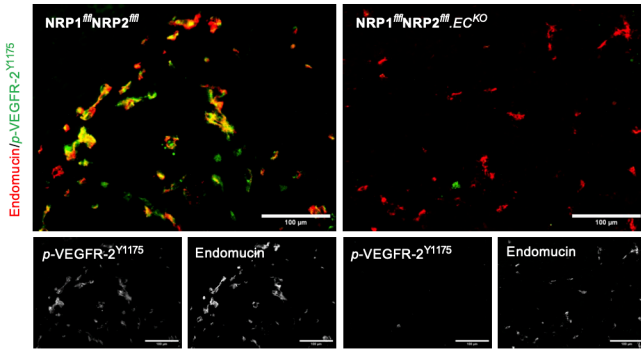

## B

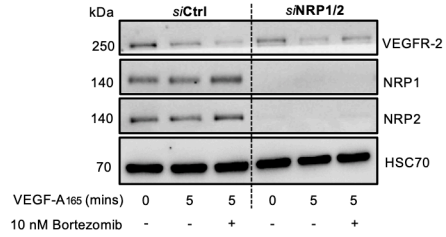

## C

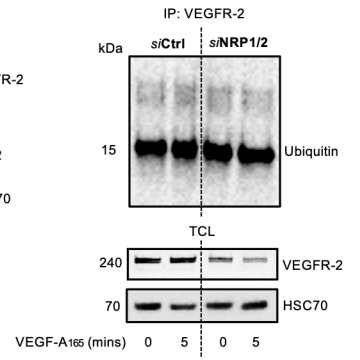

## D

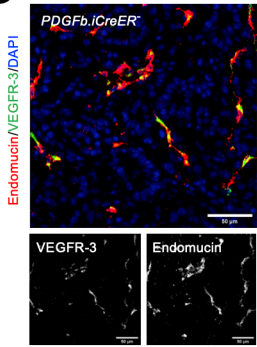

## E

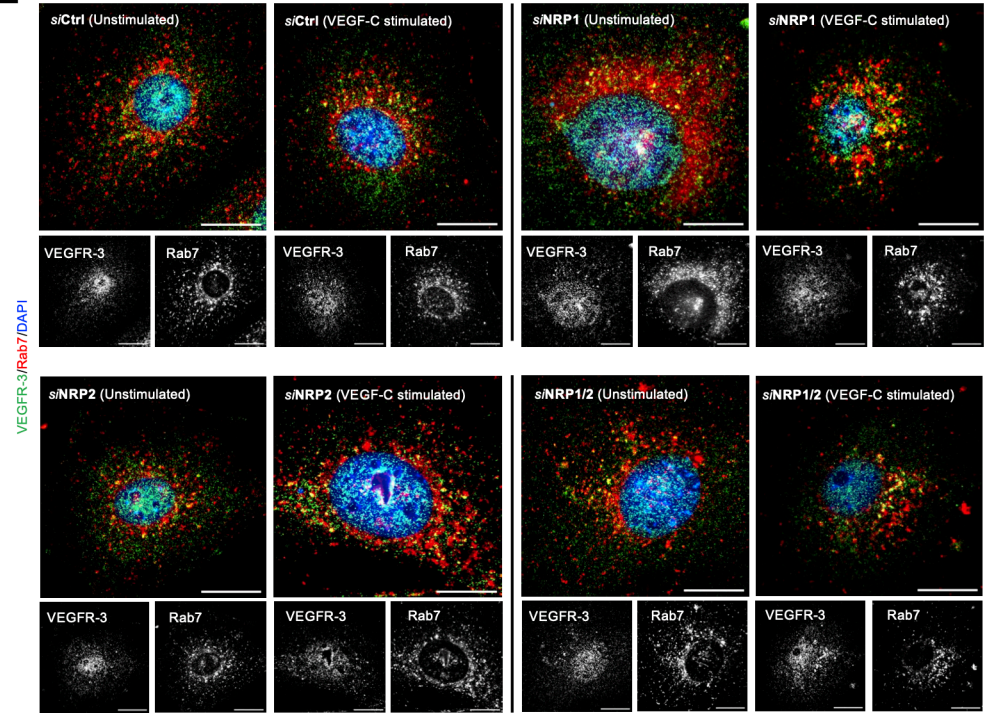

## F

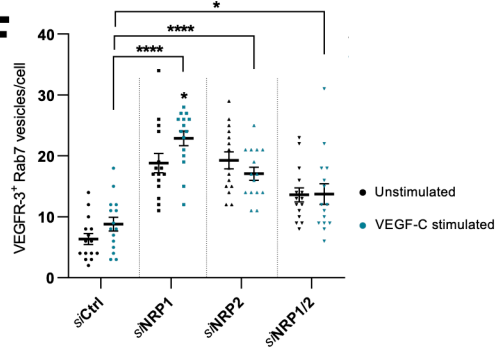

**Supplementary Figure 3: A)** Representative tumour sections from Cre-negative and Cre-positive tumours showing p-VEGFR-2Y1175 expression. Scale bar = 100  $\mu$ m. **B)** siRNA-treated ECs were seeded onto 10  $\mu$ g/ml FN for 48 hours, then incubated in serum-free OptiMEM  $\pm$  10 nM Bortezomib for 6 hours. ECs were then stimulated, lysed, separated by SDS-PAGE and subjected to Western blot analysis. Membranes were incubated in anti-VEGFR-2, NRP1, NRP2 and HSC70 primary antibodies. **C)** ECs were seeded onto 10  $\mu$ g/ml FN for 48 hours before being incubated in serum-free OptiMEM for 3 hours. ECs were then stimulated with 30 ng/ml VEGF-A for the indicated timepoints before lysis. EC lysates were immunoprecipitated with Protein G Dynabeads<sup>TM</sup> coupled to an anti-VEGFR-2 primary antibody. Immunoprecipitated proteins were separated by SDS-PAGE and subjected to Western blot analysis. Membranes were incubated in anti-ubiquitin primary antibody. Total cell lysates expression of VEGFR-2 and HSC70 are shown. **D)** Representative tumour section from Cre-negative control CMT19T tumour showing colocalisation between VEGFR-3 and endomucin+ blood vessels. Scale bar = 100  $\mu$ m. **E)** siRNA-treated ECs were seeded onto acid-washed, oven-sterilised coverslips pre-coated with 10  $\mu$ g/ml FN for 3 hours. ECs were incubated in serum-free OptiMEM for 3 hours, before being subject to 5 minutes of stimulation with 100 ng/ml VEGF-C. Coverslips were fixed in 4% PFA, blocked and permeabilised. ECs were incubated with anti-VEGFR-3 and anti-Rab7 primary antibodies overnight at 4°C before incubation with appropriate Alexa fluor secondary antibodies at RT for 1 hour. Coverslips were mounted with flouromount G with DAPI<sup>TM</sup>. Panels show representative images of unstimulated and VEGF-C stimulated siRNA-treated ECs. Error bars show 20  $\mu$ m. **F)** Quantification of VEGFR-3+ Rab7 vesicles/cell. Error bars show mean  $\pm$  SEM; n=15. Asterixis indicate significance.
